# Supplementary material for: Molecular pathogenesis of microsatellite instability-high early-stage colorectal adenocarcinoma in India
Source: publisher site journal article supplement (doi:10.1515/dmpt-2024-0033), 2024-07-23
Supplement: Supplementary file 1 [file j_dmpt-2024-0033_suppl_001.xlsx]

## Sheet: Title
Title: Exploration of molecular biomarkers for early-stage microsatellite unstable colon adenocarcinomas in India.
Supplementary Data set File S1
Sheet 1	Title
Sheet 2	Patient List for nanostring
Sheet 3	Patient List for RT-PCR

## Sheet: Patient List for Nanostring
No	Subject_ID	Sample_ID#	Age	tissue	MS_status	Side	TIL
1	KSN.T	SAM0718	39	tumor	MSS	Left	no
2	KSN.N	SAM0719	39	normal	MSS	Left	no
3	KSM.N	SAM0720	53	normal	MSS	Right	yes
4	KSM.T	SAM0721	53	tumor	MSI-H	Right	yes
5	JCB.N	SAM0722	41	normal	MSS	Right	yes
6	JCB.T	SAM0723	41	tumor	MSI-H	Right	yes
7	SIV.N	SAM0724	49	normal	MSS	Right	yes
8	SIV.T	SAM0725	49	tumor	MSS	Right	yes
9	AN.T	SAM1491	46	tumor	MSI-H	Right	yes
10	ES.T	SAM1492	58	tumor	MSS	Right	yes
11	SH.T	SAM1493	50	tumor	MSI-H	Right	yes
12	SK.T	SAM1494	54	tumor	MSS	Right	no
13	KNR.T	SAM1495	76	tumor	MSI-H	Right	yes
14	VVC.T	SAM1496	66	tumor	MSI-H	Right	no
15	RV.T	SAM1497	67	tumor	MSS	Left	yes
16	KNR.N	SAM2642	76	normal	MSS	Right	no
17	VVC.N	SAM2643	66	normal	MSS	Right	no
18	RV.N	SAM2644	67	normal	MSS	Left	no

## Sheet: Patient List for RT-PCR
No	Sub_ID	SUB_ID	Age	Location	Differentiation	Type	MLH1	MSH2	PMS2	MSH6	TIL	MSI (no. / 5)
1	RC	T1	67	Asc. Colon	Poor	Papillary	D	P	D	P	Yes	5
2	MAJ	T2	62	Left colon	Moderate	Signet ring cell	P	D	P	D	No	5
3	VKC	T3	49	Hepatic flexure	Moderate	Papillary	P	D	P	D	Yes	5
4	SS	T4	42	Hepatic flexure	Well	Papillary	P	D	P	D	Yes	5
5	AV	T5	21	Hepatic flexure	Moderate	Mucinous	D	P	D	P	Yes	5
6	VS	T6	59	Descending colon	Well	Papillary	P	P	P	D	Yes	4
7	NAM	T7	52	Asc. Colon	Moderate	Papillary	D	P	D	P	Yes	5
8	SA	T8	56	Splenic flexure	Moderate	Papillary	D	P	D	P	Yes	5
9	VA	T9	75	Transverse colon	Moderate	Mucinous	D	P	D	P	Yes	5
10	PGU	T10	56	Splenic flexure	Well	Papillary	P	D	P	D	Yes	5
11	VG	T11	73	Asc. Colon	Moderate	Mucinous	D/P	P	D/P	P	Yes	5
12	SNK	T12	58	Right colon	Well	Mucinous/tubuo villous	P	D	P	D	No	5
13	PNG	T13	71	Hepatic flexure	Moderate	Mucinous	P	P	D	P	Yes	4
14	SPS	T14	61	Sigmoid	Moderate	Mucinous	D	P	D	P	Yes	5
15	JS	T15	40	Transverse colon	Poor	Papillary	D	P	D	P	Yes	5
